# Supplementary material
Source: PubMed Central journal article supplement (PMC1622797)
Supplement: pnas_0510086103_1.pdf [file pnas_0510086103_1.pdf]

**A**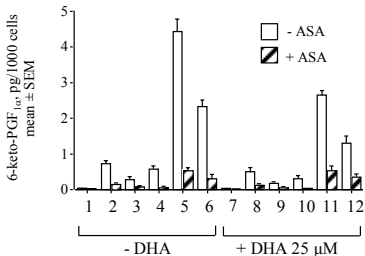

1 = control

2 = AA 50 μM

3 = thrombin 10 U/mL

4 = IL-1 10 ng/mL

5 = IL-1 + AA

6 = IL-1 + thrombin

7 = control

8 = AA 50 μM

9 = thrombin 10 U/mL

10 = IL-1 10 ng/mL

11 = IL-1 + AA

12 = IL-1 + thrombin

**B**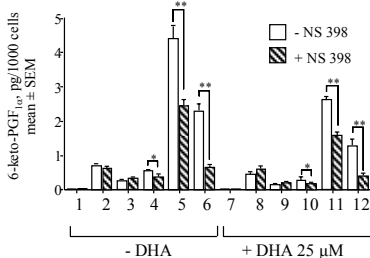

1 = control

2 = AA 50 μM

3 = thrombin 10 U/mL

4 = IL-1 10 ng/mL

5 = IL-1 + AA

6 = IL-1 + thrombin

7 = control

8 = AA 50 μM

9 = thrombin 10 U/mL

10 = IL-1 10 ng/mL

11 = IL-1 + AA

12 = IL-1 + thrombin
