# Supplementary material
Source: PubMed Central journal article supplement (PMC1622797)

**A**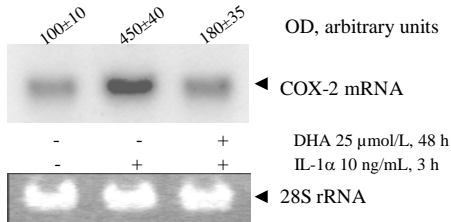**B**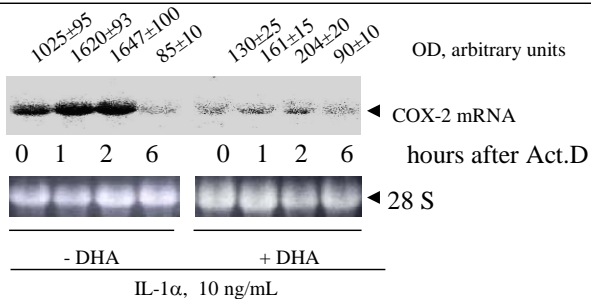

Supplement: pnas_0510086103_2.pdf [file pnas_0510086103_2.pdf]

**A**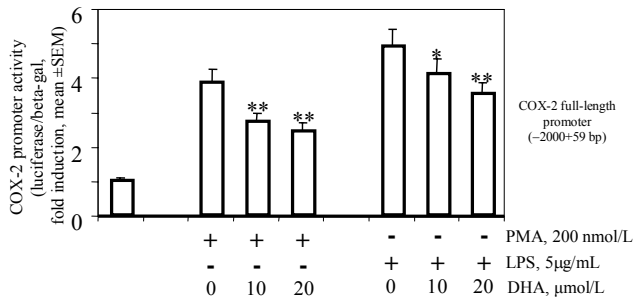**B**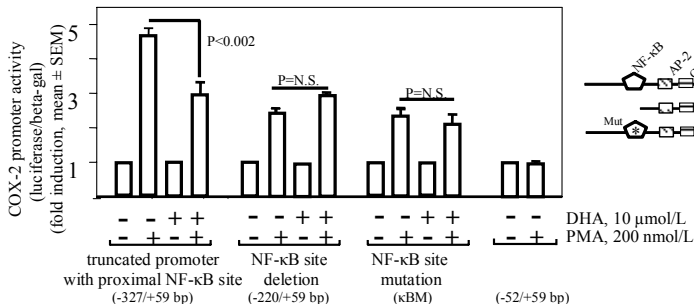

Supplement: pnas_0510086103_3.pdf [file pnas_0510086103_3.pdf]

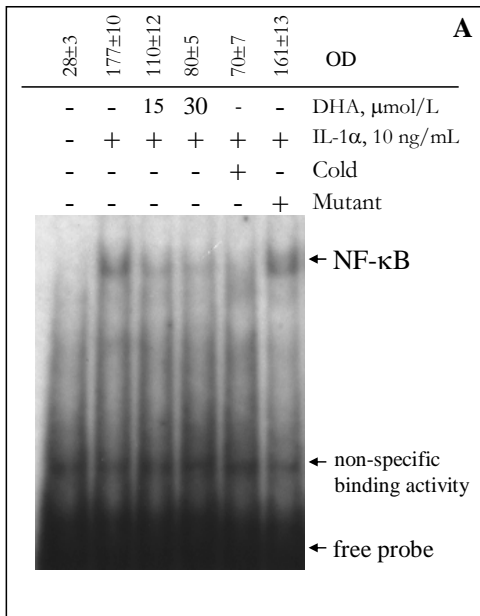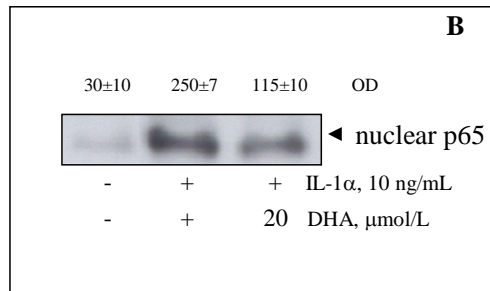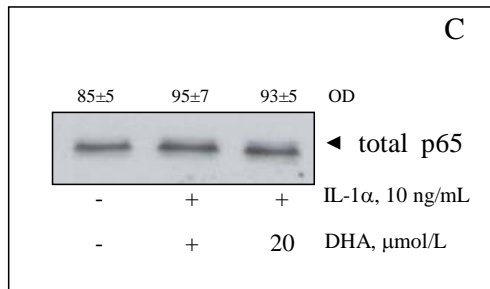

Supplement: pnas_0510086103_4.pdf [file pnas_0510086103_4.pdf]
